# Supplementary material for: Antimicrobial Resistance and β-Lactamase Production in Clinically Significant Gram-Negative Bacteria Isolated from Hospital and Municipal Wastewater
Source: MDPI journal article supplement (doi:10.3390/antibiotics12040653), 2023-03-26
Supplement: s1 [file s1]

# Antimicrobial Resistance and $\beta$ -Lactamase Production in Clinically Significant Gram-Negative Bacteria Isolated from Hospital and Municipal Wastewater

Mohammad Irfan \*, Alhomidi Almotiri and Zeyad Abdullah AlZeyadi

Department of Clinical Laboratory Sciences, College of Applied Medical Sciences, Shaqra University, AdDawadmi 17464, Saudi Arabia; hsalmutiri@su.edu.sa (A.A.); zalzeyadi@su.edu.sa (Z.A.A.)

\* Correspondence: mquraish@su.edu.sa

**Table S1.** Biochemical analyses of isolates.

| Serial No. | Isolates Code | Sample Source           | Biochemical Test |            |                 |         |              | Motility |
|------------|---------------|-------------------------|------------------|------------|-----------------|---------|--------------|----------|
|            |               |                         | Indole           | Methyl Red | Voges-Proskauer | Citrate | Oxidase test |          |
| 1          | HI-1          | Hospital wastewater     | -                | -          | +               | +       | -            | +        |
| 2          | HI-2          | Hospital wastewater     | -                | -          | +               | +       | -            | -        |
| 3          | HI-3          | Hospital wastewater     | -                | -          | +               | +       | -            | -        |
| 4          | HI-4          | Hospital wastewater     | -                | -          | -               | +       | -            | -        |
| 5          | HI-5          | Hospital wastewater     | -                | -          | -               | +       | -            | -        |
| 6          | HI-6          | Hospital wastewater     | -                | -          | -               | +       | -            | -        |
| 7          | HI-7          | Hospital wastewater     | -                | -          | -               | +       | +            | +        |
| 8          | MI-1          | Municipal wastewater    | +                | +          | -               | -       | -            | +        |
| 9          | MI-2          | Municipal wastewater    | +                | +          | -               | -       | -            | +        |
| 10         | MI-3          | Municipal wastewater    | +                | +          | -               | -       | -            | +        |
| 11         | MI-4          | Municipal wastewater    | -                | -          | +               | +       | -            | -        |
| 12         | MI-5          | Municipal wastewater    | -                | -          | +               | +       | -            | -        |
| 13         | MI-6          | Municipal wastewater    | -                | -          | +               | +       | -            | +        |
| 14         | MI-7          | Municipal wastewater    | -                | +          | -               | +       | -            | +        |
| 15         | MI-8          | Municipal wastewater    | -                | +          | -               | +       | -            | +        |
| 16         | MI-9          | Municipal wastewater    | -                | +          | -               | +       | -            | +        |
| 17         | MI-10         | Municipal wastewater    | -                | -          | -               | +       | -            | -        |
| 18         | MI-11         | Municipal wastewater    | -                | -          | -               | +       | -            | -        |
| 19         | MI-12         | Municipal wastewater    | -                | -          | -               | +       | +            | +        |
| 20         | MI-13         | Municipal wastewater    | -                | -          | -               | +       | +            | +        |
| 21         | MI-14         | Municipal wastewater    | -                | -          | -               | +       | +            | +        |
| 22         | ME-1          | Municipal Treated Water | -                | -          | +               | +       | -            | +        |
| 23         | ME-2          | Municipal Treated Water | -                | -          | -               | +       | +            | +        |

**Table S2.** Antibiotic resistance profile.

| Sample Sources | Sample Types  | Isolates Code | Ceftazidime (CAZ) | Cefotaxime (CTX) | Cefepime (FEP) | Imipenem (IMP) | Meropenem (MEP) | Ciprofloxacin (CIP) | Gentamicin (GEN) | Trimethoprim-Sulfamethoxazole (SXT) | Amoxicillin clavulanate (AMC) | Colistin (CST) |
|----------------|---------------|---------------|-------------------|------------------|----------------|----------------|-----------------|---------------------|------------------|-------------------------------------|-------------------------------|----------------|
| Hospital       | wastewater    | HI-1          | S                 | R                | S              | R              | R               | S                   | S                | R                                   | S                             | S              |
|                |               | HI-2          | S                 | R                | R              | R              | S               | S                   | S                | R                                   | S                             | S              |
|                |               | HI-3          | S                 | R                | S              | R              | R               | R                   | S                | R                                   | R                             | S              |
|                |               | HI-4          | S                 | R                | R              | S              | S               | S                   | S                | S                                   | S                             | s              |
|                |               | HI-5          | S                 | R                | S              | S              | S               | S                   | R                | S                                   | S                             | s              |
|                |               | HI-6          | S                 | R                | R              | S              | S               | S                   | S                | S                                   | S                             | s              |
|                |               | HI-7          | R                 | S                | R              | S              | S               | R                   | R                | S                                   | R                             | s              |
| Municipal      | wastewater    | MI-1          | S                 | R                | S              | S              | R               | R                   | S                | R                                   | S                             | S              |
|                |               | MI-2          | R                 | R                | S              | S              | S               | R                   | S                | S                                   | S                             | S              |
|                |               | MI-3          | S                 | R                | S              | R              | S               | S                   | R                | S                                   | S                             | S              |
|                |               | MI-4          | S                 | R                | S              | R              | R               | S                   | S                | S                                   | R                             | S              |
|                |               | MI-5          | S                 | S                | S              | S              | S               | S                   | R                | S                                   | S                             | S              |
|                |               | MI-6          | S                 | R                | S              | S              | S               | S                   | R                | S                                   | R                             | S              |
|                |               | MI-7          | R                 | R                | S              | S              | S               | R                   | S                | R                                   | R                             | S              |
|                |               | MI-8          | S                 | S                | R              | R              | R               | S                   | S                | S                                   | R                             | S              |
|                |               | MI-9          | R                 | R                | R              | S              | R               | S                   | S                | R                                   | R                             | S              |
|                |               | MI-10         | S                 | S                | S              | R              | R               | R                   | S                | R                                   | s                             | s              |
|                |               | MI-11         | S                 | R                | R              | R              | R               | S                   | S                | R                                   | R                             | s              |
|                |               | MI-12         | S                 | S                | R              | R              | R               | R                   | R                | S                                   | R                             | s              |
|                |               | MI-13         | S                 | S                | S              | R              | R               | S                   | S                | S                                   | S                             | s              |
|                |               | MI-14         | R                 | S                | S              | S              | R               | R                   | R                | S                                   | S                             | s              |
|                | Treated water | ME-1          | S                 | R                | s              | S              | S               | R                   | R                | S                                   | R                             | S              |
|                |               | ME-2          | S                 | R                | S              | S              | S               | S                   | R                | S                                   | S                             | s              |

Note: R-Resistant, S-Sensitive.

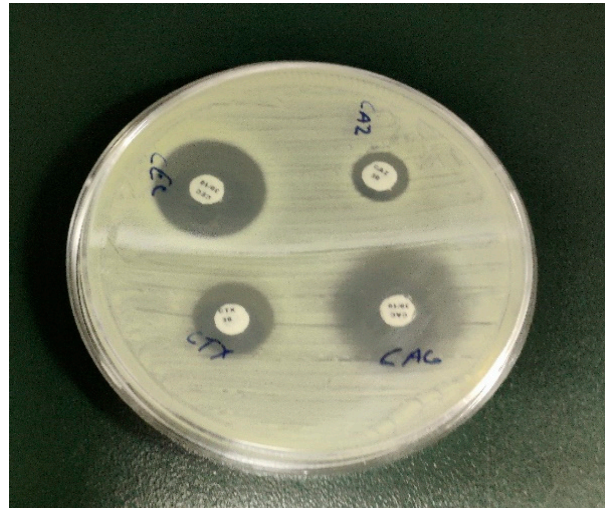

**Figure S1.** A double disc diffusion test was carried out to verify the presence of ESBL, discs containing ceftazidime (CTX) (30  $\mu$ g), cefotaxime (CAZ) (30  $\mu$ g), and a combination of clavulanic acid (30  $\mu$ g)/10  $\mu$ g) were used. The isolates were determined to be producers of ESBL if the difference in the zone of inhibition of the drug and inhibitor was at least 5 mm compared to cephalosporin alone..

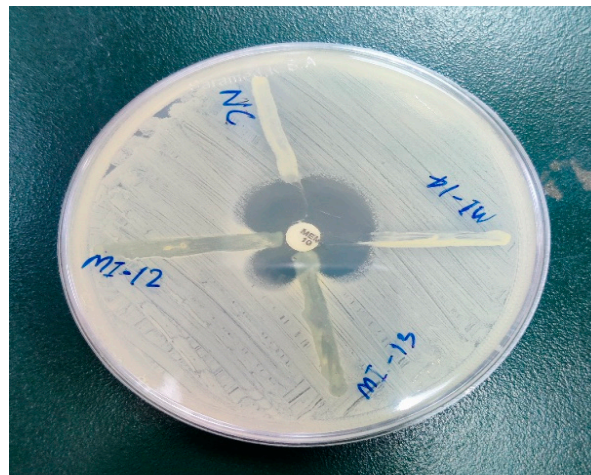

**Figure S2.** 10  $\mu$ g of meropenem was left in the middle of the plate and then the isolates were spread in a thin line from the edge of the disc that extended to the edge of the plate. A distorted inhibitory zone in the shape of a clover leaf on the meropenem disc around the growth indicated a positive result.

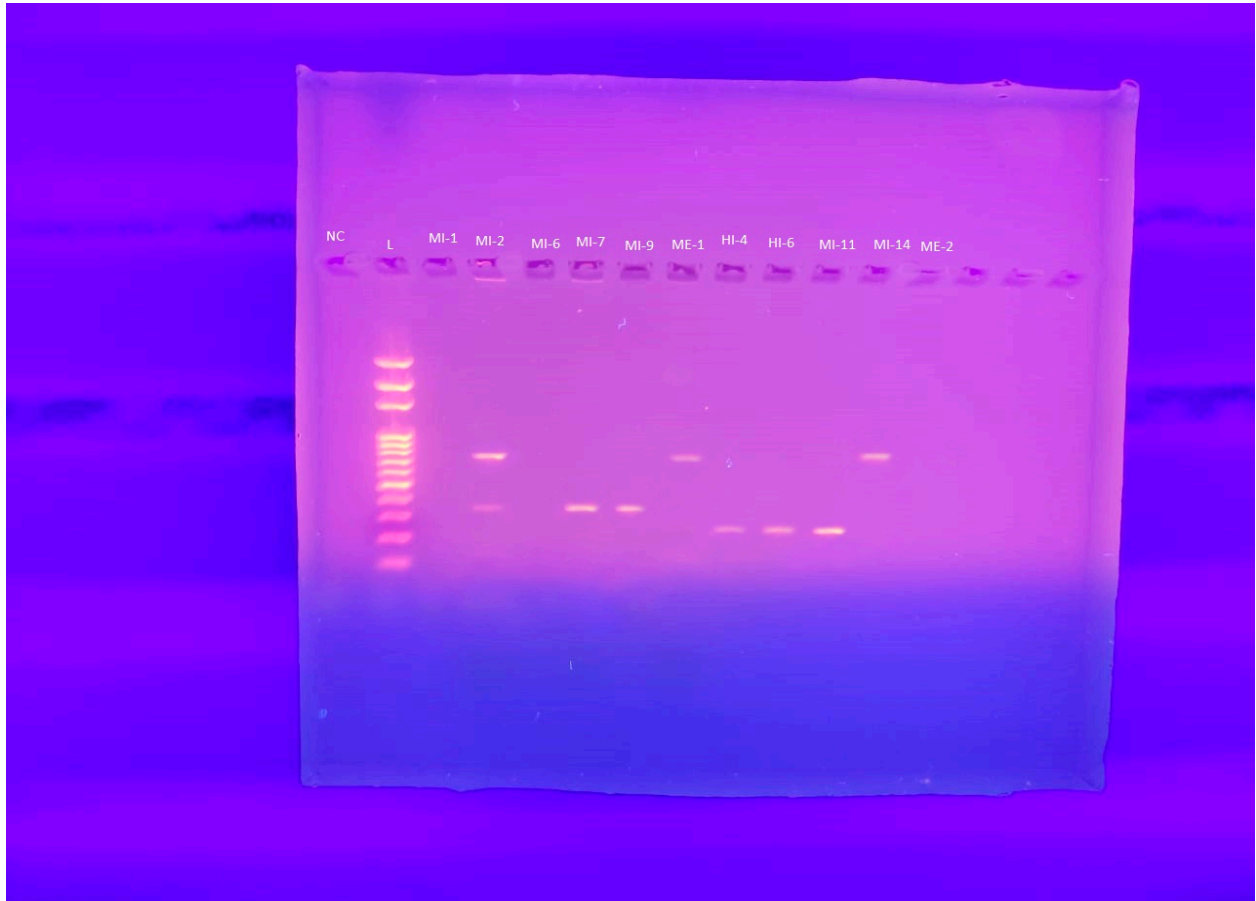

**Figure S3.** Detection of ESBL genes (multiplex PCR). From left to right: NC – Negative control, L – 100 bp ladder, MI-1, MI-6 and ME-2 – Negative, MI-2- 786 and 356bp bands, MI-7 and MI-9- 356 bp band, ME-1 and MI-14-786 bp band, HI-4, HI-6 and MI-11- 255 bp band.

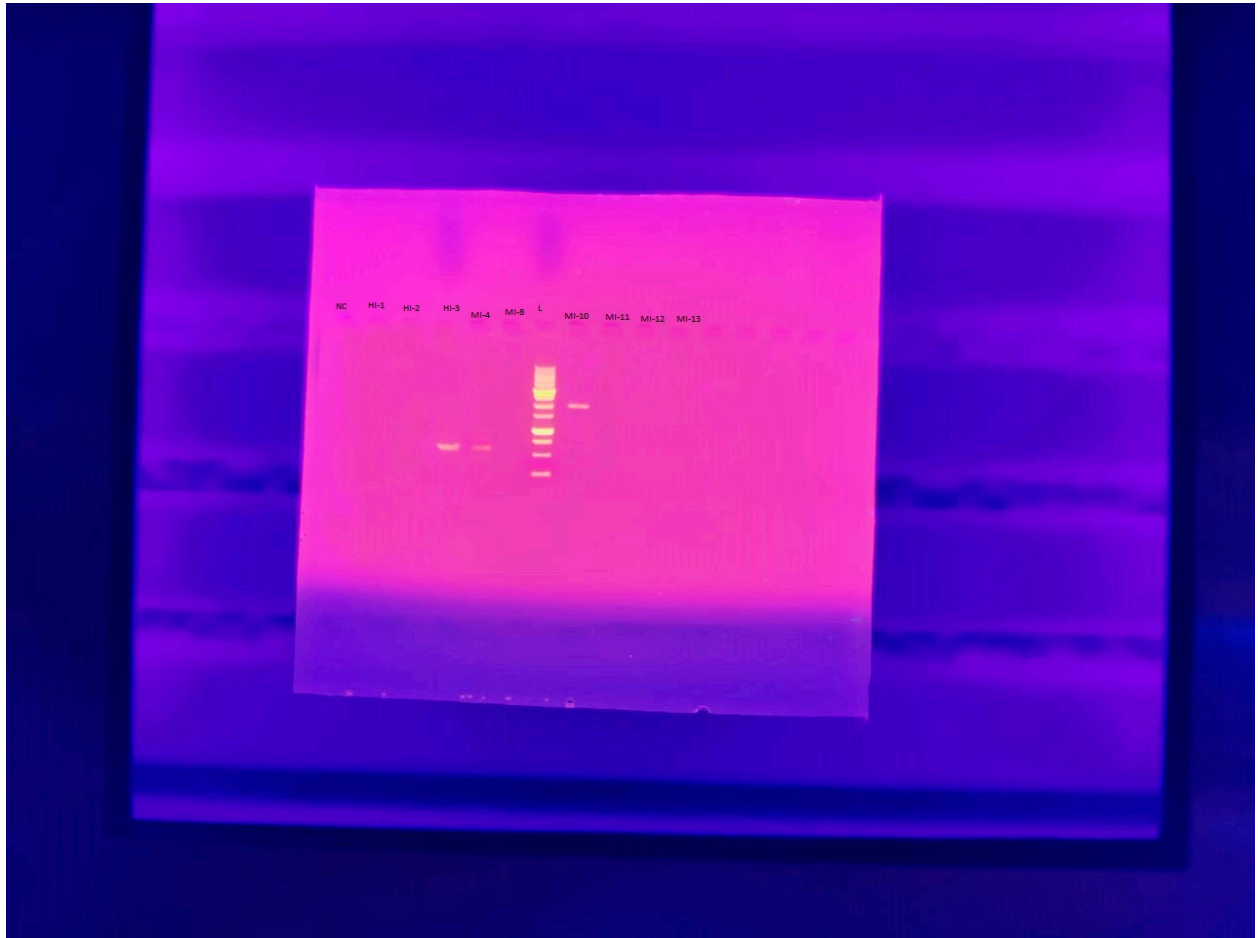

**Figure S4.** Detection of Carbapenemase genes (multiplex PCR). From left to right: NC – Negative control, HI-1, HI-2, MI-8, MI-11, MI-12, MI-13 are negative. HI-3 and MI-4 - 281 bp band, L – 100 bp ladder, MI-10 - 621 bp band.
